# Supplementary material for: Increasing the CpG dinucleotide abundance in the HIV-1 genomic RNA inhibits viral replication
Source: PubMed Central journal article supplement (PMC5679385; doi:10.1186/s12977-017-0374-1), 2017-11-09

### A) Codon modified context

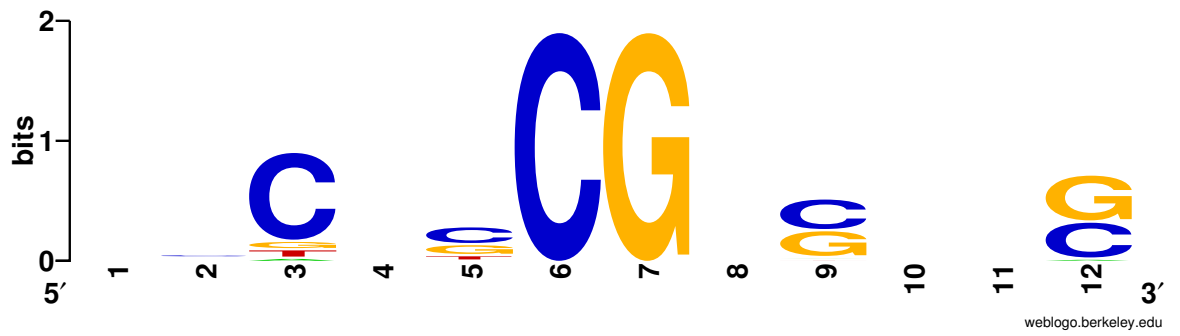

### B) Wild type HIV-1 context

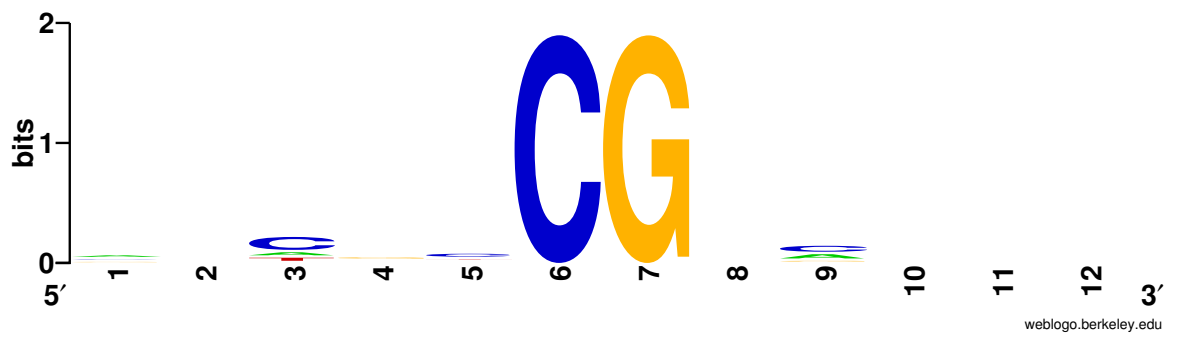

Supplement: 12977_2017_374_MOESM4_ESM.pdf [file 12977_2017_374_MOESM4_ESM.pdf]
